# Supplementary material for: Artificial Neural Networks Combined with the Principal Component Analysis for Non-Fluent Speech Recognition
Source: MDPI journal article supplement (doi:10.3390/s22010321), 2022-01-01
Supplement: s1 [file s1]

# Supplementary Material

## Artificial Neural Networks Combined with the Principal Component Analysis for Non-Fluent Speech Recognition

Izabela Świetlicka <sup>1,\*</sup>, Wiesława Kuniszyk-Józkowiak <sup>2</sup> and Michał Świetlicki <sup>3</sup>

<sup>1</sup> Department of Biophysics, University of Life Sciences, Akademicka 13, 20-950 Lublin, Poland; izabela.swietlicka@up.lublin.pl

<sup>2</sup> Faculty of Physical Education and Health in Biała Podlaska, Józef Piłsudski University of Physical Education in Warsaw, Akademicka 2, 21-500 Biała Podlaska, Poland; wieslawa.jozkowiak@awf.edu.pl

<sup>3</sup> Department of Applied Physics, Faculty of Mechanical Engineering, Lublin University of Technology, Lublin, Poland; m.swietlicki@pollub.pl

\* Correspondence: izabela.swietlicka@up.lublin.pl

**Table S1.** Disfluent samples characteristics.

| No | Disfluency Type | Disfluency Duration [ms] | Time after Last Repetition [ms] | Number of Repetitions |
|----|-----------------|--------------------------|---------------------------------|-----------------------|
| 1  | b               | 1394                     | 471                             | 2                     |
| 2  | b               | 1201                     | 390                             | 2                     |
| 3  | b               | 1930                     | 171                             | 1                     |
| 4  | b               | 2928                     | 66                              | 2                     |
| 5  | b               | 2480                     | 471                             | 1                     |
| 6  | b               | 789                      | 23                              | 1                     |
| 7  | b               | 834                      | 159                             | 1                     |
| 8  | b               | 1396                     | 273                             | 3                     |
| 9  | b               | 466                      | 49                              | 1                     |
| 10 | b               | 1205                     | 113                             | 4                     |
| 11 | b               | 1017                     | 13                              | 5                     |
| 12 | b               | 803                      | 39                              | 6                     |
| 13 | b               | 1855                     | 71                              | 3                     |
| 14 | b               | 2125                     | 70                              | 2                     |
| 15 | b               | 2328                     | 62                              | 3                     |
| 16 | b               | 1053                     | 74                              | 6                     |
| 17 | b               | 2630                     | 71                              | 9                     |
| 18 | b               | 1306                     | 117                             | 5                     |
| 19 | b               | 2234                     | 89                              | 6                     |
| 20 | b               | 2217                     | 126                             | 7                     |
| 21 | b               | 1345                     | 425                             | 2                     |
| 22 | b               | 2546                     | 27                              | 9                     |
| 23 | b               | 1917                     | 86                              | 6                     |

|    |    |      |      |    |
|----|----|------|------|----|
| 24 | b  | 2446 | 1175 | 8  |
| 25 | b  | 1645 | 46   | 5  |
| 26 | b  | 245  | 66   | 1  |
| 27 | b  | 696  | 442  | 1  |
| 28 | b  | 479  | 318  | 1  |
| 29 | b  | 424  | 289  | 1  |
| 30 | b  | 2599 | 104  | 11 |
| 31 | b  | 491  | 292  | 1  |
| 32 | b  | 421  | 215  | 1  |
| 33 | b  | 2536 | 479  | 4  |
| 34 | b  | 903  | 146  | 1  |
| 35 | b  | 2316 | 31   | 4  |
| 36 | b  | 852  | 31   | 1  |
| 37 | b  | 2135 | 59   | 1  |
| 38 | b  | 768  | 102  | 2  |
| 39 | b  | 1193 | 89   | 3  |
| 40 | b  | 709  | 351  | 1  |
| 41 | b  | 1473 | 786  | 1  |
| 42 | b  | 2337 | 570  | 1  |
| 43 | b  | 1596 | 429  | 2  |
| 44 | b  | 1047 | 310  | 1  |
| 45 | b  | 1279 | 464  | 2  |
| 46 | b  | 934  | 128  | 3  |
| 47 | b  | 1043 | 427  | 1  |
| 48 | b  | 1517 | 63   | 3  |
| 49 | b  | 830  | 189  | 3  |
| 50 | b  | 702  | 38   | 3  |
| 51 | b  | 2096 | 789  | 1  |
| 52 | b  | 1034 | 390  | 1  |
| 53 | b  | 649  | 41   | 1  |
| 54 | b  | 2355 | 483  | 4  |
| 55 | b  | 1690 | 228  | 2  |
| 56 | sr | 1094 | 137  | 1  |
| 57 | sr | 2620 | 1287 | 1  |
| 58 | sr | 1863 | 861  | 1  |
| 59 | sr | 1798 | 94   | 2  |
| 60 | sr | 525  | 103  | 1  |
| 61 | sr | 2764 | 35   | 2  |
| 62 | sr | 2640 | 630  | 1  |
| 63 | sr | 1717 | 65   | 2  |
| 64 | sr | 601  | 183  | 1  |
| 65 | sr | 607  | 231  | 1  |
| 66 | sr | 484  | 55   | 1  |
| 67 | sr | 1420 | 1041 | 1  |
| 68 | sr | 1786 | 84   | 2  |

|     |    |      |     |   |
|-----|----|------|-----|---|
| 69  | sr | 1006 | 471 | 1 |
| 70  | sr | 1298 | 273 | 1 |
| 71  | sr | 850  | 434 | 1 |
| 72  | sr | 1181 | 477 | 1 |
| 73  | sr | 975  | 533 | 1 |
| 74  | sr | 1042 | 443 | 1 |
| 75  | sr | 2244 | 716 | 1 |
| 76  | sr | 558  | 141 | 1 |
| 77  | sr | 753  | 224 | 1 |
| 78  | sr | 272  | 45  | 1 |
| 79  | sr | 891  | 88  | 2 |
| 80  | sr | 290  | 50  | 1 |
| 81  | sr | 758  | 123 | 1 |
| 82  | sr | 505  | 144 | 1 |
| 83  | sr | 516  | 94  | 2 |
| 84  | sr | 378  | 165 | 1 |
| 85  | sr | 388  | 47  | 1 |
| 86  | sr | 1250 | 69  | 1 |
| 87  | sr | 261  | 47  | 1 |
| 88  | sr | 1452 | 72  | 2 |
| 89  | sr | 1800 | 53  | 2 |
| 90  | sr | 637  | 71  | 1 |
| 91  | sr | 818  | 88  | 3 |
| 92  | sr | 2442 | 322 | 4 |
| 93  | sr | 1609 | 126 | 3 |
| 94  | sr | 1185 | 391 | 1 |
| 95  | sr | 1292 | 67  | 1 |
| 96  | sr | 1302 | 180 | 1 |
| 97  | sr | 1629 | 18  | 2 |
| 98  | sr | 700  | 73  | 1 |
| 99  | sr | 665  | 74  | 1 |
| 100 | sr | 911  | 55  | 2 |
| 101 | sr | 2051 | 205 | 5 |
| 102 | sp | 560  |     |   |
| 103 | sp | 640  |     |   |
| 104 | sp | 597  |     |   |
| 105 | sp | 522  |     |   |
| 106 | sp | 579  |     |   |
| 107 | sp | 1639 |     |   |
| 108 | sp | 587  |     |   |
| 109 | sp | 2769 |     |   |
| 110 | sp | 2859 |     |   |
| 111 | sp | 1668 |     |   |
| 112 | sp | 1939 |     |   |
| 113 | sp | 577  |     |   |

|     |    |      |  |  |
|-----|----|------|--|--|
| 114 | sp | 1796 |  |  |
| 115 | sp | 477  |  |  |
| 116 | sp | 2777 |  |  |
| 117 | sp | 2698 |  |  |
| 118 | sp | 2941 |  |  |
| 119 | sp | 2320 |  |  |
| 120 | sp | 709  |  |  |
| 121 | sp | 567  |  |  |
| 122 | sp | 639  |  |  |
| 123 | sp | 801  |  |  |
| 124 | sp | 1371 |  |  |
| 125 | sp | 903  |  |  |
| 126 | sp | 548  |  |  |
| 127 | sp | 369  |  |  |
| 128 | sp | 466  |  |  |
| 129 | sp | 570  |  |  |
| 130 | sp | 1893 |  |  |
| 131 | sp | 688  |  |  |
| 132 | sp | 821  |  |  |
| 133 | sp | 700  |  |  |
| 134 | sp | 706  |  |  |
| 135 | sp | 414  |  |  |
| 136 | sp | 1289 |  |  |
| 137 | sp | 707  |  |  |
| 138 | sp | 816  |  |  |
| 139 | sp | 358  |  |  |
| 140 | sp | 1164 |  |  |
| 141 | sp | 702  |  |  |
| 142 | sp | 617  |  |  |
| 143 | sp | 972  |  |  |
| 144 | sp | 403  |  |  |
| 145 | sp | 622  |  |  |
| 146 | sp | 454  |  |  |
| 147 | sp | 419  |  |  |
| 148 | sp | 499  |  |  |
| 149 | sp | 787  |  |  |
| 150 | sp | 1968 |  |  |
| 151 | sp | 1603 |  |  |
| 152 | sp | 1288 |  |  |
| 153 | sp | 1011 |  |  |
| 154 | sp | 767  |  |  |
| 155 | sp | 2224 |  |  |
| 156 | sp | 507  |  |  |
| 157 | sp | 574  |  |  |
| 158 | sp | 831  |  |  |

|     |    |      |  |  |
|-----|----|------|--|--|
| 159 | sp | 496  |  |  |
| 160 | sp | 2845 |  |  |

b – blocks, sr – syllable repetitions, sp – syllable prolongations.
